# Supplementary material
Source: HighWire-hosted journal article supplement (https://bmjophth.bmj.com/content/9/1/e001664)
Supplement: inline-supplementary-material-2 [file inline-supplementary-material-2.pdf]

Supplementary Table 2 Cross-sectional logistic regression analyses of novel adiposity indexes and visual impairment.

| Cross-sectional logistic regression analyses of novel adiposity indexes and visual impairment |               |                      |               |                      |               |                      |               |                      |              |                      |
|-----------------------------------------------------------------------------------------------|---------------|----------------------|---------------|----------------------|---------------|----------------------|---------------|----------------------|--------------|----------------------|
|                                                                                               | Model 1       |                      | Model 2       |                      | Model 3       |                      | Model 4       |                      | Model 5      |                      |
|                                                                                               | OR            | 95%CI                | OR            | 95%CI                | OR            | 95%CI                | OR            | 95%CI                | OR           | 95%CI                |
| WhtR                                                                                          | 1.056         | (0.965,1.154)        | 1.084         | (0.990,1.187)        | 1.089         | (0.994,1.193)        | 1.033         | (0.941,1.133)        | 1.183        | (0.989,1.414)        |
| WWI                                                                                           | <b>1.099*</b> | <b>(1.017,1.189)</b> | <b>1.087*</b> | <b>(1.005,1.176)</b> | <b>1.089*</b> | <b>(1.007,1.179)</b> | <b>1.089*</b> | <b>(1.007,1.179)</b> | <b>1.087</b> | <b>(0.999,1.184)</b> |
| ABSI                                                                                          | 1.098         | (0.975,1.236)        | 1.082         | (0.960,1.219)        | 1.080         | (0.959,1.217)        | 1.063         | (0.942,1.199)        | 1.063        | (0.942,1.199)        |
| BRI                                                                                           | 1.026         | (0.983,1.072)        | 1.039         | (0.994,1.086)        | 1.041         | (0.996,1.088)        | 1.041         | (0.996,1.088)        | 1.091        | (0.999,1.189)        |
| CI                                                                                            | 1.614         | (0.802,3.249)        | 1.757         | (0.868,3.557)        | 1.771         | (0.874,3.586)        | 1.769         | (0.873,3.582)        | 1.689        | (0.780,3.656)        |

The results of the logistic regression models were expressed as odds ratios (OR) and 95% confidence intervals (CI). The analytic sample size was 7,750.

Model 1: adjusted for demographic factors including age and gender; Model 2: adjusted for factors in Model 1, as well as social-economic including marital status, educational level and living area; Model 3: adjusted for factors in Model 2, as well as lifestyle factors including smoking status and alcohol consumption; Model 4: adjusted for factors in Model 3, as well as medical insurance covering; Model 5: adjusted for factors in Model 4, as well as BMI.

\*p < 0.05
